# Supplementary material for: Carbon and Beyond: The Biogeochemistry of Climate in a Rapidly Changing Amazon
Source: Frontiers journal article supplement (doi:10.3389/ffgc.2021.618401), 2021-03-11
Supplement: Table_1.XLSX [file Table_1.XLSX]

## Sheet: S1 Rates
	Supplementary Table 1. Relevant Emissions Rate Estimates for Forest Climate Forcing Agents
Year	Author	Journal	Research Type	Study Site	Forcing Agent	Net Emissions	Source/Sink	Field Rate	Global	Notes	Significance
BVOC
1988	Jacob and Wofsy	Journal of Geophysical Research	Modelling	Amazon forest photochemical model	BVOC	+	Forests	38mg Isoprene m-2 d-1	N	NA	Photooxidation of isoprene could contribute significantly to CO enrichment and could be a significant source of formic acid methacrylic acid and pyruvic acid
1995	Guenther	Journal of Geophysical Research	Modelling	Global model	BVOC	+	Natural sources	1150 Tg C y-1	Y	Rate= 44% isoprene, 11% monoterpenes, 22.5% other reactive VOC, 22.5% other VOC. Methane not included. Large uncertainties exist for each, particularly for compounds other than isoprene and monoterpenes.	Half of all global natural VOCs from tropical woodlands
2002	Rinne et al.	Atmospheric Environment	Original research	Amazon rainforest	BVOC	+	Vegetation, terrestrial	2.4 mg m−2 h−1 (Isoprene) and 0.26 mg m−2 h−1 (β-pinene)	N	Under conditions of 30°C and 1000 μmol m−2 s−1	Both fluxes lower than estimates from global models. Montoterpene fluxes dependent on light and temperature.
2002	Guenther	Chemosphere	Review	Global	BVOC	+	Vegetation	7 g C m-2 yr-1 to over 100 g m-2 yr-1	Y	Highest emissions from tropical location	Relative to total C emissions, these fluxes are small on the landscape and global scales, but significant to net fluxes
2006	Lathiere et al.	Atmoshperic Chemistry and Physics	Modelling	Global model	BVOC	+	Vegetation	752±16 Tg C yr-1	Y	Average global BVOC emissions	Quantified global emissions of all BVOCs
2006	Guenther	Atmoshperic Chemistry and Physics	Modelling	Global model	BVOC	+	Vegetation	"Annual global isoprene emission 500 to 750 Tg isoprene (440 to 660 Tg carbon) average about 600 Tg isoprene (using standard driving variables)"	Y	NA	Emissions dependent on temperature, solar radiation, Leaf Area Index, and plant functional type. Projected temperature increases could increase isoprene emissions by over a factor of two by 2100
2016	Alves et al.	Atmoshperic Chemistry and Physics	Original research/ Modelling	Cuieiras Biological Reserve	BVOC	+	Forest, primary	"The maximums for isoprene (2.53 ± 0.5 µmol m−2 h −1 ) and total monoterpenes (1.77 ± 0.05 µmol m−2 h −1 ) were observed in the late dry season, whereas the maximum for total sesquiterpenes was found during the dry-to-wet transition season (0.77 ±0.1 µmol m−2 h−1)"	N	NA	Main source of isoprene emissions is the canopy and isoprene emissions vary based on seasonal changes
2016	Jardine et al.	Atmoshperic Chemistry and Physics	Original research	7 individuals of Vismia guianensis were studied in the Reserva Biologica do Cuieiras	BVOC	+	Forests, secondary	20 to 45 nmol m−2s−1under standard conditions of PAR and leaf temperature and up to 80 nmol m−2s−1at maximum PAR fluxes of 3000 μmol m−2s−1	N	Light stimulation in young mature leaves was associated with Isoprene emissions	Secondary rainforest tree species emit higher isoprene emissions than reported by Harley et al. 2004
Methane
1988	Devol et al.	Journal of Geophysical Research	Original research	94 individual flux measurements along a 1,700‐km stretch of river	CH4	+	Floodplain	Overall average rate of CH4 emission from wetland study sites was 390 mg CH4 m−2 d−1. Estimated annual 10 Tg CH4 yr−1 for entire Amazon floodplain.	N	Water surfaces covered by aquatic macrophytes had highest emissions, followed by open lake then flooded forests. Ebullition was the dominant mechanism of emission	Ebullition dominant mechanism of emissions
1990	Bartlett et al.	Geophysical Research	Original research	3 floodplain environments of open‐water lakes and channels, floating grass mats, and flooded forests, along 1500 km of central floodplain.	CH4	+	Wetlands	Wetland sources overall: 110 Tg CH4 yr-1	N	74±14 mg CH4/m2/d (open water), 201±35 mg CH4/m2/d (grass mats), 126±20 mg CH4/m2/d (flooded forests)	Highest ebullition emissions during periods of falling water
1992	Wassmann et al.	Global Biogeochemical Cycles	Original research	Amazon floodplain varzea	CH4	+	Floodplain forest, floating vegetation, open water	Ebullition up to 200mg CH4 m-2 d-1. Difussion flux bellow 29 mg CH4 m-2 d-1	N	Significant differences were observed in the release of methane from individual vegetation types, i.e., phytoplankton, floating grass mats, and flooded forest. Each vegetation type showed a distinct seasonal pattern	Highest ebullition rates in flooded forests
2000	Engle and Melack	Biogeochemistry	Original research	Lake Calado	CH4	+	Lake, floodplain	High and rising water: 2–20 mg CH4 m−2d−1 (mean: 6.6 mg CH4 m−2d−1). Falling water: total methane flux ranged from 53–328 mg CH4 m−2 d−1 (mean, 163 mg CH4 m−2 d−1)	N	Total methane flux was highest when thermal stratification was lost due to decreasing lake depth and Ebullitive flux averaged 69% of total flux.	Direct measurement of Amazon floodplain lake methane fluxes
2000	Koschorreck	Biogeochemistry	Original research	Marchantaria Island, Amazon River	CH4	+	Exposed lake sediments	Inundated sediments: 10 - 40 µmol CH4 m−2 h−1, exposed sediments: ~0 µmol CH4 m−2 h−1. Mean flux 3.7 μmol CH4 m−2 h−1	N	Methane emission decreased from values between 10 and 40 μmol CH4 m−2 h−1 to zero when the sediments were exposed to air	CH4 turnover not significant to sediment C budget compared to CO2 emissions
2004	Bastviken et al.	Global Biogeochemical Cycles	Original research	11 North American and 13 Swedish lakes, and literature values from 49 lakes	CH4	+	Lakes	Global emissions 8–48 Tg CH4 yr−1	Y	NA	Predictions of methane emissions using easily measured lake characteristics
2005	Whalen	Environmental Engineering Science	Review	Global	CH4	+	Wetlands	145 Tg CH4 y-1	Y	About 25% of total emissions from all anthropogenic and natural sources	Global wetland CH4 emissions estimates
2006	Braga do Carmo et al.	Geophysical Research Letters	Original research	3 sites in upland old growth forest in the Brazilian Amazon	CH4	+	Forests, upland	2-21 mg CH4 m−2 d−1	N	NA	Reported missing souce of up to 90 Tg yr-1 in broad-lead tropical forests
2007	Dutar and Verchot	Global Change Biology	Review	Global	CH4	-	Soil	20-45 Tg yr−1	Y	NA	CH4 uptake controlled by ecosystem type, geographic zone, and soil texture
2007	Marani and Alvala	Atmospheric Environment	Original research	Miranda River, in five sites inside the Brazilian Pantanal region	CH4	+	Lakes, floodlplain	Overall average of the 320 individual CH4 flux measurements made between March/2004 and March/2005 was 142±314 mg CH4 m−2 d−1	N	NA	Pantanal contributes about 3.3 Tg CH4 yr-1 which is about 3.3% of total estimated CH4 emissions from wetland ecosystems
2007	Miller et al.	Geophysical Research Letters	Original research	Surface to 3,600m above Santarem and Manaus	CH4	+	All	27 mg CH4/m2/day	N	Assumed emissions from plants are uniform throughout the year	Direct airbone CH4 measurements
2010	Bastviken et al.	Enviornmental Science and Technology	Original research	16 natural shallow lakes in the Pantanal region	CH4	+	Lakes	Range 3.9 to 74.2 mmol m−2 d−1. Average 8.8 mmol m−2 d−1 (131.8 mg CH4 m−2 d−1)	N	NA	28-98% (average 91%) of lake CH4 flux from ebullition
2010	Martinson et al.	Nature Geoscience	Original research	167 Tank bromeliads in the Eucadorian Andes	CH4	+	Tank bromeliads	Extrapolated CH4 emissions from tank bromeliads amount to 3.6 g CH4 ha−1 d−1	N	All of the tank bromeliads emitted methane. Found a diverse community of methane-producing archaea within the water-containing tanks, suggesting that the tanks served as the source of the methane. Global source strength of 1.2 Tg CH4 yr−1	Tank bromeliads are a new source of methane
2011	Bastviken et al.	Science	Original research	474 freshwater ecosystems	CH4	+	Freshwaters	103 Tg of CH4 year−1, corresponding to 0.65 petagrams of C as CO2 equivalents year−1	Y	Offsets 25% of the estimated land carbon sink	Freshwaters important in global carbon cycle, continental GHG sink could be significantly overestimated
2012	Beck et al.	Atmoshperic Chemistry and Physics Discussions	Modeling	Amazon lowland region	CH4	+	All	Average CH4 flux of 9– 31 mg m−2 d−1 for November 2008 and 8–36 mg m−2 d−1 for May 2009	N	NA	Wetland inundation map choice more important than model choice for calculating anaerobic CH4 emissions from wetlands
2012	Bloom et al.	Biogeosciences	Modeling	Tropical wetland model	CH4	+	Wetlands	Estimated that tropical emissions amounted to 111.1 Tg CH4 yr−1	Y	NA	24% of total tropical CH4 emissions come from Amazon wetlands
2013	Kirschke et al.	Nature Geoscience	Modeling	Global	CH4	+	All	Top-down total global emissions 548 Tg of CH4 yr-1 (526–569) and a global sink of 540 (514–560) Tg CH4 yr–1. Bottom-up source 678 Tg CH4 yr–1, sink 632 (592–785) Tg CH4 yr–1	Y	NA	Overestimate of natural CH4 emissions in bottom-up models
2014	Carmichael et al.	Biogeochemistry	Synthesis	Global	CH4	+	All	32–143 Tg CH4 year−1	Y	NA	Understadning role of vegetation crucial to closing gap in global methane budget
2014	Bogard et al.	Nature Communications	Original research	Oxygenated water column of Lac Cromwell	CH4	+	Oxic water columns	0.07 to 0.36 mmol m−2 d-1	N	NA	Oxic water methanogenisis significant to CH4 budget in small shallow lakes and may be the main CH4 source in large, deep lakes/ oceans
2014	Sawakuchi et al.	Global Change Biology	Original research	Amazon river and its main tributaries	CH4	+	Rivers	0.40-0.58 Tg CH4 yr−1	N	Significant differences observed within sites and among different rivers, types of rivers, and seasons. Ebullition contributed >50% of total emissions for some rivers.	Large Amazonian rivers account for about 22-28% of global CH4 emissions from rivers
2014	Ringeval et al.	Biogeosciences	Modeling	Floodplains in Amazon Basin model	CH4	+	Floodplain	Simulated Amazon-integrated emissions of 44.4 ± 4.8 Tg CH4 yr−1	N	NA	Developing process-based model of tropical floodplain CH4 emissions for global applications
2016	Wilson et al.	Global Biogeochemical Cycles	Modeling	Regional models of the Amazon Basin	CH4	+	All	Total basin-wide methane emissions of 36.5–41.1 Tg(CH4)/yr in 2010 and 31.6–38.8 Tg(CH4)/yr in 2011.	N	NA	Up to 7% of global CH4 emissions from the Amazon
2016	Basso et al.	Journal of Geophysical Research	Original research	Above the eastern Brazilian Amazon	CH4	+	All	Annual average flux of 52.8 ± 6.8 mg CH4 m-2 d-1 over an area of approximately 1 × 106 km2.	N	Fluxes are highest in two periods of the year: in the beginning of the wet season and during the dry season. Biogenic emissions dominate the flux.	Vertical CH4 mole fraction profiles measured regularly for 13 years
2016	Barbosa et al.	Limnology and Oceanography	Original research	Negro River and its major tributaries and Solimoes and Madeira rivers	CH4	+	Rivers	0.31 Tg C yr-1	N	NA	First extensive CH4 measurements for the Negro River and its major tributaties
2016	Saunois et al.	Earth System Science Data	Review	Global Methane budget	CH4	+	All	Top-down inversions at 558 Tg CH4 yr−1 , range 540–568. Bottom-up approaches suggest larger global emissions 736 Tg CH4 yr−1, range 596–884	Y	Bottom-up approaches suggest larger emissions mostly because larger natural emissions from individual sources such as inland waters, natural wetlands and geological sources	Ongoing review paper for the global methane budget
2017	Pangala et al.	Nature	Original research	13 floodplain locations in central Amazon River basin	CH4	+	Trees, floodplain/ all	Floodplain trees emit 15.1 ± 1.8 to 21.2 ± 2.5 Tg CH4 yr-1. Total basin wide emission estimate for all sources 42.7±5.6 Tg CH4 yr-1	N	NA	In the Amazon floodplain, methane emissions from wetland trees accounts for about half of total wetland CH4 emissions
2018	Barbosa et al.	Biogeochemistry	Original research	Amazon floodplain lake	CH4	-	Lake	Volumetric CH4 oxidation rates ranging from 1 to 132 mg C m−3 d−1	N	NA	Methane oxidation important CH4 sink in Amazonian lakes
2019	Dalmagro et al.	Global Change Biology	Original research	Pantanal	CH4	-	Forest, flooded	During inundation when soils were anaerobic, the flooded forest emitted 0.11 ± 0.002 g CH4‐C m−2 d−1 and absorbed 1.6 ± 0.2 g CO2‐C m−2 d−1. Net C sink on an annual basis (absorbing 218 g C m−2 (as CH4‐C + CO2‐C) in anaerobic phases and emitting 76 g C m−2in aerobic phases)		CH4 fluxes were 50 times higher in the wet season; DOC was a minor component in the net ecosystem carbon balance.	Net C sink on an annual basis, but high CH4 effluxes during anaerobic flooded phase and modest CH4 effluxes during aerobic phase indicate that seasonally flooded tropical forests can be a net source of radiative forcings on an annual basis
Carbon Dioxide
1995	Davidson and Trumbore	Tellus B	Original research	Deep soils of forests and pastures of the eastern amazon	CO2	+	Soil	Mean wet season: forest- 290 mg CO2-C m-2 h-1, pasture- 140 mg CO2-C m-2 h-1. Dry season: forest- 240 mg CO2-C m-2 h-1, pasture-110 mg CO2-C m-2 h-1	N	70-80% of CO2 flux from soil surface was produced in top 1 m (including litter in the forest). 20-30% produced below 1 m from root respiration and microbial decay of root inputs at depth	Land-use changes that impact deep roots could impact deep soil C stocks significantly over decades to centuries
1998	Phillips et al.	Science	Original research	Mature humid tropical forests in South America	CO2	-	Forests	Forest plots accumulated 0.71 ton ± 0.34 ton C ha-1 y-1	N	NA	Neotropical forests are potentially a siginificant carbon sink which can offset the increasing rate of CO2 emissions
2002	Richey et al.	Nature	Original research	Central Amazon basin	CO2	+	Wetland and river evasion	1.2 ± 0.3 Mg C ha-1 yr-1. Extrapolated across the entire basin: 0.5 Gt C yr-1	N	Carbon probably originates from organic matter transported from upland and flooded forests	C budget of rainforests including both terrestrial and aquatic environments more in balance than estimates from just uplands
2003	Houghton et al.	Tellus B	Original research	Global	CO2	+	All	Average annual fluxes during the 1980s and 1990s were 2.0 and 2.2 PgC yr−1, respectively	Y	Dominated by releases of carbon from the tropics	Revised earlier estimates
2003	Saleska et al.	Science	Original research	2 old-growth forest sites near Santarém, Brazil	CO2	+	All	3-year average carbon loss was 1.3 (confidence interval: 0.0 to 2.0) megagrams of carbon ha-1 yr-1	N	NA	Opposite to seasonal cycles from model predictions, in the wet season carbon was lost and in the dry season it was gained
2006	Bernoux et al.	Agronomy for Sustainable Development	Review	Brazil	CO2	-	Soil	Most studies of Brazilian soils give rates of carbon storage in the top 40 cm of the soil of 0.4 to 1.7 t C ha-1 y-1	N	Carbon storage rates after conversion of CT to DMC. Highest rates in Cerrado region	The effects of no-till systems on carbon sequestration are greatest in the topsoil with little effects on deeper soils
2007	Cooley at al.	Global Biogeochemical Cycles	Original research/ synthesis	Amazon River Plume	CO2	-	Amazon River Plume	15 ± 6 TgC yr−1	N	NA	Amazon plume C sink sensative to climate conditions that influence hydrology, CO2 solubility, and gas exchange
2009	Lahteenoja et al.	Global Change Biology	Original research	17 wetland sites in Peruvian lowland Amazonia	CO2	_	Peatlands	Long‐term apparent peat and C accumulation rates from 39 ± 10-85 ± 30g C m-2 yr-1	N	NA	Amazon peatlands are an important C sink and also a potential C source
2009	Carvalho et al.	Soil and Tillage Research	Original research	Amazon Cerrado	CO2	_	Soil	When N2O and CH4 emissions in C-equivalent were subtracted, the soil C sequestration rate of the conversion of rice under CT into soybean under NT was 0.23 Mg ha−1 yr−1.	N	Although there were positive soil C sequestration rates, the results do not include a full C balance in soil management changes in the Amazon Cerrado	Crop management practices following land conversion influenced soil C stocks and impacted GHG directly and indirectly
2010	Bouchez et al.	Geology	Original research	Solimões and Madeira Rivers and Amazon mainstream at Obidos	CO2	+	Rocks	~0.25 Mt C/yr	N	Graphite is the most stable phase with respect to this oxidation process	Emphasized the significance of OCpetro oxidation in large river floodplains in the global carbon cycle.
2010	Gatti et al.	Tellus B	Original research	Vertical profiles above eastern Amazonia	CO2	+	All	Wet season (Jan-June) 0.44 ± 0.38 gC m−2 d−1 and dry season (July to December) 0.35 ± 0.17 gC m−2 d−1. Annual flux mean is 0.40 ± 0.27 gC m−2 d−1	N	High seasonal variability especially between wet and dry seasons, higher and more variable in wet seasons	Between 2000 and 2009 the net carbon flux was balanced
2010	Davidson et al.	Journey of Geophysical Research	Original research	3 streams in remnant mature forests in Para, Brazil	CO2	+	Groundwater evasion	0.02-0.15 Mg C ha-1 of land area yr-1	N	NA	In terrestrial ecosystems, CO2 loss from grounwater to streams insiginificant. In riparian zones or areas with eroison, C loss to streams potentially significant
2011	Pan et al.	Science	Synthesis	Global	CO2	-	Forest	Net global forest sink of 1.1 ± 0.8 Pg C year–1	Y	Tropical estimates have greatest uncertainty	Estimated global forest carbon sinks
2011	Rudorff et al.	Journal of Geophysical Research	Original research	Lago Grande de Curuai in the floodplain of the Amazon River	CO2	+	Lakes, floodplain	44 ± 15, 348 ± 13, 371 ± 23, and 364 ± 20 mmol CO2 m−2 d−1 during receding, low, rising, and high water, respectively	N	NA	Current regional estimates of CO2 evasion rates from large lakes in the lower Amazon floodplain should be at least 2 to 4 times higher.
2013	Raymond et al.	Nature	Synthesis	Global	CO2	+	Inland waters	global evasion rate of 2.1 Pg C yr−1	Y	Regional varaiations	Including stream and river contributions produce higher rates than previously recorded, stream and river evasion potential golabl hotspot
2014	Fernando D.B.Espírito-Santo et al.	Nature Communications	Synthesis	Amazon Forest Regions	CO2	+	Aboveground biomass	Aboveground biomass losses: small-scale ~1.28 Pg C y−1. Intermediate-scale ~0.01 Pg C y−1. Largest-scale ~0.003 Pg C y−1	N	NA	Amazon is a net carbon sink despite disturbances
2014	Abril et al.	Nature	Original research	Amazon river and its floodplains	CO2	+	Wetland evasion	0.21 PgC yr-1	N	NA	Half of GPP from Amazonian wetlands exported to rivers, only a few percent exported to upland ecosystems
2016	Poorter et al.	Nature	Original research	45 sites and 1,500 plots across environmental gradients in Neotropics	CO2	-	Forests, secondary	3.05 Mg C ha−1 yr−1	N	NA	Secondary forests uptake carbon 11 times faster than old-growth forests
2017	Phillips et al.	Carbon Balance and management	Synthesis	Mature Amazon forests in 9 Amazon nations	CO2	-	Forests	Net sink of 4 Tg C yr-1-243 Tg C yr-1	N	NA	Amazon conservation areas are significant global C sinks with the largest sink in Brazil
2017	Sanders et al.	Limnoogy and Oceanography Letters	Original research	4 floodplain lakes within the Amazon Basin	CO2	-	Lakes, floodlplain	Carbon burial rate 266 ± 57 g C m−2 yr−1	N	NA	Significant C burial rates in Amaazon floodplain lakes can help offset GHG emissions at higher rates than other lake types
Nitrous Oxide
1996	Kern et al.	Microbial Ecology	Original research	Floodplain sediments and exposed lake sediments	N2O	+	Sediments	Ranged from 192.3 to 640.7 μmol N m−2 h−1 in the 0- to 5-cm sediment layer	N	NA	Dentrification source of N2O to atmosphere from Amazon floodplain	\
2002	Steudler	Global Biogeochemical Cycles	Experimental/observational	Pasture and forest, Rhondonia	N2O		Soil	Pasture: 12 ug N m-2 s-1 Upland forest: 38 ug N m-2 s-1	N	NA	NO N2O and CO2 responses to N and or P fertilization in mature moist tropical forest versus 11-year olf pasture
2007	Werner et al.	Global Biogeochemical Cycles	Modelling	Global tropics	N2O	+	Soils, tropical rainforest	Global source strength of N2O emissions from tropical rainforests may range from 0.88-2.37 Tg N yr-1	Y	NA	Global inventory of N20 emissions from tropical rainforest soils
2009	D'Amelio	Atmopheric Chemistry and Physics	Original research	Surface to 4km over two sites in the Eastern and Central Amazon (SAN) and (MAN)	N2O	+	All	MAN upwind flux annual mean was 2.1±1.0 mg N2O m−2 day−1, higher than that for fluxes upwind of SAN, which averaged 1.5±1.6 mg N2O m−2 day−1	N	Fluxes upwind MAN exhibited little seasonality	Biomass burning has larger contribution to global N2O budget than previous estimates
2011	Syakila and Kroeze	Greenhouse Gas Measurement and Management	Synthesis	Global	N2O	+	All	Increased from 12 Tg N year−1 in 1500 to 19 Tg N year−1 in 2006	Y	Natural emissions accounting for about 55% and anthropogenic emissions accounting for about 45% in 2006	Updated global N2O budget
2012	Zhuang et al.	Atmospheric Environment	Synthesis	Global natural ecosystem inventory	N2O	+	Soil	3.37 Tg N yr-1	Y	Large spatial and seasonal variability	Quantified global N2O soil emissions, calls for more site level measurements
2013	Schlesinger et al.	Global Change Biology	Review	Global	N2O	-	Soil, natural ecosystems	The consumption of nitrous oxide in soils is not likely to exceed 0.3 Tg N yr−1	Y	NA	Sink projected to be 2% or less of current N2O source estimates	\
2014	Bruhn et al.	Atmospheric Enviironment	Original research	Grass vegetation sites and laboratory	N2O	+	Terrestrial vegetation	20–50 nmol m−2 h−1	Y	N2O production mostly due to UV. Emission rate is temperature dependent with a rather high activation energy indicative for an abiotic process	Investigated the effects of natural solar UV radiation on terrestrial vegetation N2O emissions
2014	Liengaard	Soil Biology & Biogeochemistry	Original research	Seasonally drained wetlands from the Pantanal and the Amazon	N2O	+	Soils, tropical wetland	Over a period of 168 h of wetting, the cumulative flux of N2O, estimated from the measured N2O concentration profiles and measured with the flux chamber was 38.6 and 67.2 mmol N2O m−2, respectively	N	NA	3 phases of N2O dynamics during hot moments 1) slow N2O production 2) Faster N2O production until NO3 and NO2 exhausted 3) accuulated NO2 reduced to N2
Multiple
1986	Keller et al.	Journal of Geophysical Research	Original research	Tropical forests in Brazil, Ecuador, and Puerto Rico	CO2, CH4, N2O	+	All	Mean fluxes to the atmosphere were 1.7 × 1010, −0.7 × 1010, and 1.5 × 1014 molecules cm−2s−1 for N2O, CH4, and CO2, respectively	N	Emissions of CO2 from forest soils are higher at equitorial sites than at middle or high latitudes	Tropical forests soils significant source of N2O, insignificant CH4 sink, and are a larger source of CO2 than sink of C in litterfall
2001	Davidson et al	The Scientific World	Review	Amazon and Cerrado regions of Brazil	N2O, NO	+	Soil, native and exotic ecosystems	Annual emissions of N2O: ranging from 1.4 to 2.4 kg N ha–1 yr–1, with a mean of 2.0 kg N ha–1 yr–1. Annual emissions of NO: ranging from 1.4 to 1.7 kg N ha–1 yr–1, with a mean of 1.5 kg N ha–1 yr–1.	N	NA	Reviewed 5 studies on N2O and NO emissions from soils and found the estimates to be similar
2002	Palm	Global Biogeochemical Cycles	Original research	6 different land use systems in the Peruvian Amazon	N2O, CH4	+	All	N2O: Range from -2.47 to 25.6 mg C m-2 h-1 for all systems expcept for Nov and Dec in the cropping systems max values got up to 236.6 (high input) and 106.6 (low input). CH4: range -2.62 to -0.13 kg C ha-1 y-1 with secondary forest lowest and cropping systems highest	N	NA	N2O and CH4 fluxes highest in cropping systems
2003	Pinguelli Rosa et al.	Hydrological Processes	Original research	2 Brazilian reservoirs (Samuel and Tucuruí)	CH4 and CO2	+	Resevoirs	Bubble emissions in Samuel (ranging from 2 to 70 mgCH4 m−2 day−1), in Tucuruí (ranging from 0·5 to 30 mgCH4 m−2 day−1). Diffusion emissions in Tucuruí ranged from 5 to 30 mgCH4 m−2day−1, in Samuel ranged from 10 to 80 mgCH4 m−2 day−1. The CO2 concentration for both ranged from 1000 to 10,000 mgCO2 m−2 day−1	N	NA	Direct measurements of CO2 and CH4 from Brazillian resevoirs
2004	Garcia-Montiel	Ecological Applications	Original research, modelling	Terre firme in Rondonia, Brazil	N2O, CO2	+	Forests, terra firme	Average flux from the forest soils of the Amazon Basin was 7.9 x 10^11 g N O-N/yr	N	Highest subregional fluxes coming from the most productive forests in the north-western part of the basin and emissions decreased as environmental conditions became drier to the east and south	Annual N2O flux estimates and their spatial patterns from the unidsturbed forests in the region
2010	Belger	Bigeochemistry	Original research	Interfluvial wetlands in the upper Negro River basin, Brazil	CO2, CH4	+	Wetlands, interfluvial	63 Tg C yr-1 of CO2 and 1.7 Tg C yr-1 as CH4 are estimated as the regional evasion to the atmosphere	N	NA	Direct measurements of diffusive, ebullitive and transport emissions every month in flooded and seasonally flooded sites
2013	Abril et al.	Journal of South American Earth Sciences	Original research	Two Amazonian reservoirs (Balbina and Petit Saut)	CO2 and CH4	+	Wood decomposition hydropower plants	Accounting for both below- and above-water fluxes estimate that each km2 of Amazonian forest converted to reservoir would emit over 140 Gg CO2-eq in 100 years	N	NA	Above-water decomposition is a significant and newly discovered source of C emissions from Amazonian resevoirs
2014	Sjögersten et al.	Global Biogeochemical Cycles	Review	Undisturbed forested tropical wetlands	CO2 and CH4	+	Wetlands	90± 77 Tg CH4 yr-1 and 4540± 1480 Tg CO2 yr-1	Y	CH4 fluxes are greater from mineral than organic soils, whereas CO2 fluxes do not differ between soil types	Lack of data on undisturbed tropical wetland C balance and gas fluxes limits global change models
2014	Teh	Biogeosciences	Original research	Tropical Peruvian Andes	N2O, CH4	+/-	Forest, tropical	N2O emissions from premontane forest, lower montane forest, upper montane forest and montane grasslands averaged 2.23 ± 1.31, 1.68 ± 0.44, 0.44 ± 0.47 and 0.15 ± 1.10 kg N2O-N ha−1 yr−1 . Montane grasslands 56.94 ± 7.81 kg CH4-C ha−1 yr−1, Upper montane forest and lower montane forest were net atmospheric sinks (−2.99 ± 0.29 and −2.34 ± 0.29 kg CH4-C ha−1 yr−1 respectively); while premontane fore…	N	NA	Soil CH4 and N2O cycling studied across large elevation gradient
2014	Tian et al.	Ecosystem helath and suatinability	Review	Global, including tropics	N2O, CH4	+	All	The estimated CH4 and N2O emissions from global land ecosystems during 1981–2010 were 144.39 6 12.90 Tg C/yr (mean 6 2 SE; 1 Tg 1⁄4 1012 g) and 12.52 6 0.74 Tg N/yr, respectively.	Y	Indicated a significant (P , 0.01) annually increasing trend for CH4 (0.43 6 0.06 Tg C/yr) and N2O (0.14 6 0.02 Tg N/yr) in the study period.	Review of temp, precip, Ndep, ozone etc effects on GHG fluxes
2017	Teh	Biogeosciences	Original research	Lowland tropical peatlands in Pastaza–Marañón foreland basin	CH4 and N2O	+	Peatlands	Diffusive CH4 emissions averaged 204.8 ± 23.5 mg CH4–C m−2 d −1. Net ebullition of CH4 averaged 4625.2 ± 752.1 mg CH4–C m−2 d −1. Diffusive N2O flux was low (7.90 ± 4.93 µg N2O–N m−2 d−1)	N	Significant variation among vegetation types and between seasons for diffusive fluxes	Peatlands significant sources of CH4, insignificant sources of N2O
2019	Petitjean	Soil systems	Original research	Forests, grassland, and till/ no-till croplands in French Guiana (Amazonia)	N2O, CO2, CH4	+	Soils	See table 3	N	NA	Grasslands emit significantly less N2O and significantly more CH4 emissions than crop systems

## Sheet: S2 Concepts
	Supplementary Table 2. Amazon Forest Biogeochemistry Concept Papers
Year	Author	Journal	Research Type	Study Site	Forcing Agent	Global	Notes	Significance
1983	Keller et al.	Geophysical Research Letters	Original research	Global forest soils	N2O	Y	NA	Tropical forests could be a major source of N2O
1988	Rasmussen	Journal of Geophysical Research	Original research	Amazon basin	BVOC	N	NA	Isoprene emissions experience spatial and diurnal variations
1991	Turner et al.	Chemosphere	Global model	Global	BVOC	Y	Isoprene emissions under a doubled-CO2 climate were about 25% higher than current emissions mainly to the expansion of tropical humid forests which had the highest annual emission rates.	Isporenes increase O3 and CH4 in atmosphere
1992	Mylne and Rowntree	Climate Change	Review	Tropical forests, forested and grass-covered regions	Albedo	N	NA	Reviewed effects of tropical deforistation on albedo and soil mositure
1996	Martinelli et al.	Journal of Hydrology	Original research	Amazon basin	NA	N	NA	Isotopic data show large rivers an important source of evaporative moisture to the atmosphere but other small sources missing.
1999	Kesselmeier and Staudt	Journal of Atmospheric Chemistry	Review	NA	BVOC	NA	Isoprene and monoterpenes are the most prominent compounds. Alcohols and carbonyls follow as the most predominant groups. Release of other compunds have been poorly investigated.	Review of knowledge on BVOCs
2001	Laurance et al.	Science	Original research	Models of Brazilian Amazonian forests	NA	N	NA	Over the next 20 years, land-use trends and development will significantly change the region's forests
2002	Carswell et al.	Journal of Geophysical Research	Original research	Eastern Amazonia rain forest	CO2	N	NA	Little evidence of NEE seasonal variations that have been suggested by past studies
2002	Laurance and Williamson	Conservation Biology	Synthesis	Amazon	NA	N	NA	Likely that there are positive feedbacks between deforestation, fragmentation, fire and climate change
2002	Kesselmeier et al.	Global Biogeochemical Cycles	Synthesis	Terrestrial vegetation in Meditteranean and Amazonian rainforest	BVOC	N	NA	While VOC flux estimates are small in relation to NPP and GPP, the amount of carbon lost as VOC emissions can be highly significant relative to NEP and VOC losses are of the same order of magnitude as NBP
2002	Garcia-Montiel	Geophysical Research Letters	Original research	Rondonia, Brazil	N2O	N	NA	Relationship between N2O and CO2 emissions
2003	Penuelas and Llusia	Trends in Plant Science	Review	Global	BVOC	Y	NA	Climate change will likely increase BVOC emissions causing significant positive and negative feedbacks
2004	Davidson	Global Change Biology	Original research	Amazon Basin	All	N	NA	Amazon forest-river system net GWP of biogenic gases may be balanced
2006	Neill et al.	Plant and Soil	Original research	Forest in Brazilian Amazon state of Rondônia and adjacent forest plot cleared for pasture	N2O	N	NA	Cleared forest had higher soil solution NO 3 −concentrations than intact forest, but the difference between cleared and control forests declined with time after the start of the first post-clearing rainy season. Also suggests that the relative increase in N oxide loss is substantially less than the increase solution inorganic N loss
2006	Huete et al.	Geophysical Research Letters	Original research	Amazon rainforests satellite meaasurements	CO2	N	NA	Increase grean up of Amazon forests as a result of sunlight in the dry season
2006	Batjes	Soil Use and Management	Synthesis	Soils of Brazil	CO2	N	NA	SOC stocks 65.9-67.5 Pg C, 65% in Amazonian region of Brazil
2007	Sampaio et al.	Geophysical Research Letters	Original research	Amazonia model	Transpiration	N	NA	In eastern Amazonia where changes in land cover are expected to be larger, there shows an increase in near-surface air temperature, and decrease in evapotranspiration and precipitation, which occurs mainly during the dry season
2008	Cook and Vizy	Journal of Climate	Original research	Tropical and subtropical climate and vegetation of South America models	NA	N	NA	Projects that the Amazon rainforest will be reduced by 70% by the end of the 21st century
2008	Brando et al.	Philosophical Transactions of the Royal Soceity B	Original research	Tapajos National Forest, Para, Brazil	CO2	N	Wood production was the most sensitive component of above-ground net primary productivity	Multi-year severe droughts can decrease Amazon forest carbon stocks substaincially
2008	Meir et al.	Philosophical Transactions of the Royal Soceity B	Original research	Amazon rainforests	CO2	N	NA	In the short term, soil respiration highly sensitive to moisture limitation but not temperature increases.
2008	Davidson et al.	Global Change Biology	Original research	Mature evergreen forest near Santarém, Brazil	CH4, N2O	N	NA	The dominant effect of throughfall exclusion on soil processes during this 6‐year period was on soil aeration conditions that transiently affected CH4, N2O, and NO production and consumption
2008	Myneni et al.	PNAS	Original research	Amazon rainforests satellite meaasurements	CO2	N	Seasonal swings in green leaf area of 25% in a majority of the Amazon rainforests. This seasonal cycle is timed to the seasonality of solar radiation in a manner that is suggestive of anticipatory and opportunistic patterns of net leaf flushing during the early to mid part of the light-rich dry season and net leaf abscission during the cloudy wet season.	These seasonal swings in leaf area may be critical to initiation of the transition from dry to wet season, seasonal carbon balance between photosynthetic gains and respiratory losses, and litterfall nutrient cycling in moist tropical forests
2008	Malhi et al.	Science	Review	NA	NA	N	NA	Climate change and deforestation are major threats to the Amazon
2008	Nepstad et al.	Philosophical Transactions of the Royal Soceity B	Review	Amazon	CO2	N	NA	If sea surface temperature anomalies (such as El Niño episodes) and associated Amazon droughts of the last decade continue into the future, approximately 55% of the forests of the Amazon will be cleared, logged, damaged by drought or burned over the next 20 years, emitting 15–26 Pg of carbon to the atmosphere.
2008	Cochrane and Laurence	Fire Ecology and Management	Synthesis	Amazon	NA	N	NA	Fire, land use, and climate change have synergistic effects on the Amaon
2008	Cox et al.	Nature Letters	Synthesis	Climate model of Amazonia	NA	N	NA	Increased GHG and reduced aeresol loading increases risk of drought
2008	Bonan	Science	Review	Global forests	CO2	Y	NA	Review on relationships between forests and climate change
2009	Cochrane et al.	Global Change Biology	Review	Amazon	NA	N	NA	Climate change could increase fire frequency and severity in Amazonian forests
2009	Malhi et al.	PNAS	Synthesis	Amazon rainforest	NA	N	NA	Examined probability of large scale dieback of Amazon rainforest due to climate change
2009	Phillips et al.	Science	Synthesis	Amazonia	CO2	N	Drought had a total biomass carbon impact of 1.2 to 1.6 petagrams (1.2 × 1015 to 1.6 × 1015 grams)	Moisture stress could cause large C lossess
2010	Harper et al.	Geophysical Research Letters	Original research	Tapajos National Forest	NA	N	NA	Root‐zone processes important in the hydrologic cycle and circulation in the Amazon
2010	Metcalfe et al.	New Phytologist	Original research	Caxiuana National Forest, Para State, northeastern Brazil. Lowland terra firme rainforest	CO2	N	NA	Droughts alter ecosystem C cycling and could have significant implications long-term C sequestration
2010	Pöschl et al.	Science	Original research	Amazon	Aeresol	N	NA	Amazon aeresol-cloud interactions different from polluted regions
2010	Soares-Filho et al.	PNAS	Original research	595 Brazilian Amazon protected areas	CO2	N	NA	Fully implemented protected areas could avoid 8.0 ± 2.8 Pg of carbon emissios by 2050
2010	Stoecio et al.	Soil and Tillage Research	Original research	Brazilian states of Rondônia and Mato Grosso	CO2	N	Perennial cropping had a minimal impact on SOC stocks maintaining about 98% of the SOC stocks found under native vegetation	No till could increase soil carbon
2010	Asner et al.	PNAS	Original research	Aboveground C stocks and emissions at 0.1-ha resolution over 4.3 million ha of the Peruvian Amazon	CO2	N	From 1999 to 2009, emissions from land use totaled 1.1% of the standing carbon throughout the region. Forest degradation, such as from selective logging, increased regional carbon emissions by 47% over deforestation alone, and secondary regrowth provided an 18% offset against total gross emissions.	Created high-resolution maps of carbon stocks and emissions in Amazon forests
2010	Brando et al.	PNAS	Original research	Amazon basin	CO2	N	NA	During dry periods, increased solar radiation can increase productivity but long severe droughts limit this effect by causing stomatal closure and tree death
2010	Battle-Bayer	Agriculture, Ecosystems & Enviornment	Review	Brazillian Cerrado	CO2	N	focussed on the first 0.3 m of soil, or less, and seldom considered full carbon accounting	Implementing intensive agricultural practices such as no-till and RMP decreases SOC loss after conversion from conevntional agcirultural systems
2010	Penuelas and Staudt	Trends in Plant Science	Review	NA	BVOC	Y	NA	Climate change is likely to cause an overall increase in BVOC emissions
2011	Loarie	Earth Interactions	Original research	South America	Albedo	N	Average albedo for intact forest two years before deforestation was 14% and two years after deforestation was 16.8% Over last 9 years has increased by 0.25%.	Vegetation and surface water changes primary cause of changes in Albedo
2011	Xu et al.	Geophysical Research Letters	Original research	Amazon region	CO2	N	NA	Widspread decrease in photosythesis due to 2010 drought could have significant impact on global carbon cycle more severe than 2005 drought
2011	Neto at al.	Biogeosciences	Original research	Brazilian Atlantic Forest	CO2, N2O, CH4	N	NA	An increase in air and soil temperatures may result in increases in decomposition rates and gross inorganic N fluxes that could support consequent increases in soil N2O and CO2 emissions and soil CH4 consumption
2011	Lewis et al.	Science	Original research	Amazonia	CO2	N	NA	Droughts reverse carbon sink
2012	Stark et al.	Ecology Letters	Original research	Forest near Manaus, Brazil	CO2	N	NA	Knowledge of canopy structure can explain variation in biomass growth over tropical landscapes and improve understanding of ecosystem function
2012	Base et al.	Agriculture, Ecosystems and Environment	Original research	Undisturbed tropical forest and soybean fields on southern edge of the Amazon basin Mato Grosso	NA	N	In forest 91.6% of rainfall collected as throughfall and 0.3% as stemflow, in soybean fields with two-month old plants, 46.2% of rainfall was collected as throughfall and 9.0% as stemflow	Interception of soybean is higher than forest interception which is due to plant structure and stem density
2012	Asner et al.	Biogeosciences	Original research	16.5 million ha region (>40%) of the Colombian Amazon	CO2	N	NA	High-resolution carbon mapping using a top-down approach
2012	Davidson et al.	Nature	Review	Amazon Basin	NA	N	NA	Found signs that the Amazon basin is transitioning to a disturbance-dominated regime
2012	Makkonen et al.	Atmoshperic Chemistry and Physics	Original research	Global climate model	BVOC	Y	NA	Due to simulated decreases in future cloud cover, the increased CNN concentrations from BVOCs can not provide significant additional cooling in the future.
2013	Huntingford et al.	Nature Geoscience	Original research	3 main tropical forest regions: the Americas, Africa and Asia	CO2	N	NA	Evidence of resiliance in forests
2013	Powell et al.	New Phytologist	Original research	Tapajós and Caxiuanã National Forests, Pará, Brazil	CO2	N	NA	Confronting model predictions of carbon fluxes with measurements of Amazon forests subjected to experimental drought. Model predictions agreed with the observed C fluxes in the control plots of both experiments, but poorly replicated the responses to the drought treatments.
2013	Ward et al.	Nature Geoscience Letters	Original research	Amazon river	CO2	N	NA	Suggests that lignin and other terrestrially derived macro-molecules contribute significantly to carbon dioxide outgassing from inland waters
2013	Harper et al.	Journal of Climate	Original research	Amazon Forest	transpiration	N	NA	The ‘‘stressed’’ model experiences dry season water stress and limitations on ET, while the ‘‘unstressed’’ model has enhanced root water access and exhibits strong drought tolerance
2013	Butterbach-Bahl et al.	Philosophical Transactions of The Royal Soceity B	Review	NA	N2O	Y	NA	Review of nitrous oxide emissions from soils
2014	Brando et al.	PNAS	Original research	Amazon	CO2	N	Abrupt increases in fire-induced mortality (226 and 462%) during severe drought causing sharp declines in canopy cover (23 and 31%) and aboveground live biomass (12 and 30%) and favoring widespread inasion by flammable grasses across the forest edge area (80 and 63%) where fires were most intense.	Suggests that feedbacks between fires and extreme climatic conditions could increase the likelihood of an Amazon forest dieback in the near-term. A few extreme drought events, coupled with forest fragementation and anthropogenic ignition sources are already causing wiespread fire-induced tree mortality and forest degradation across southeastern Amazon forests.
2014	Sist et al.	Forest Ecology and Management	Original research	Terra firme rain forest in the Eastern Amazon	CO2	N	Estimated that reducing logging intensity from 6 to 3 stems ha−1 would save 27.7 Mg C ha−1 for a 35 years rotation cycle.	Preserving large trees after selective logging important for carbon storage
2014	Morton et al.	Nature	Original research	Amazon forests	CO2	N	NA	Challenges idea of light-limited NPP and increased growth during droughts due to stability over seasonal timescales
2015	Doughty et al.	Nature	Original research	3 South American countries across a 2,800 m elevation range in the Andes	CO2	N	NA	Amazon-wide photosynthesis suppressed by 0.38 petagrams of carbon due to 2010 drought (0.23–0.53 petagrams of carbon)
2015	Alencar et al.	Ecological Applications	Original research	6 mill ha of 3 representative forests of eastern and southern edges of the Amazon	NA	N	NA	Transitional and open forests experienced fires two times as much as dense forests
2015	Brienen et al.	Nature	Original research	Amazon rainforest	CO2	N	Net increase in above-ground biomass declined by 1/3 due to growth rate increases levelling while biomass mortality persistently increased throughout, shortening of carbon residence times	Amazonian forets have been a long-term C sink, but long-term trend shows decreasing C accumulation
2015	Fauset et al.	Nature Communications	Original research	Amazonian Forest	CO2	N	NA	50% of C storage and productivity in the Amazon is from ≈1% of Amazon tree species
2015	Pinto Dias et al.	Journal of Hydrology: Regional Studies	Original research	Upper Xingu River Basin	Transpiration	N	NA	Agricultural ecosystems have significantly lower evapotrasnpiration and streamflow
2015	Jardine et al.	Plants	Original research	Central Amazon	BVOC	N	NA	Violatile terpenoid emissions could initially increase during dought but will then decrease
2015	Swann et al.	Agricultural and Forest Meteorology	Original research	South America	Transpiration	N	NA	Deforestation leads to a decrease in latent heat flux and a drier atmosphere
2015	Hedin	Nature	Review	Tropical forests	CO2	N	NA	Tropical forest carbon sink could be becoming saturated
2015	Spracklen and Garcia-Carreras	Geophysical Research Letters	Synthesis	Amazon basin	NA	N	NA	Current deforestation extent estimated to reduce annual rainfall across Amazon basin by 1.8% and estimated to be 8.1% by 2050.
2016	Levine et al.	PNAS	Original research	Amazon forests	NA	N	NA	Tropical forest climate sensitivity influenced by the length of the dry season, soil type, and competition within the canopy
2016	Jimenez-Munoz et al.	Nature Geoscience	Original research	Amazon rainforest	NA	N	NA	EN event combined with the regional warming trend was associated with unprecedented warming and a larger extent of extreme drought in Amazonia compared to earlier strong EN events
2016	Navarrete et al.	Global Change Biology	Original research	Two (high and low-grazing intensity) subregions in the Colombian Amazon	CO2	N	20 years after forest-to-pasture conversion, SOC in HG decreased by 20% whereas in LG SOC increased by 41%	Good management practices including low-grazing important to increase soil carbon and reduce C emissions after forest to pasture conversion
2016	Alden	Global Change Biology	Original research	Amazon forests	NA	N	NA	Amazon NBE sensitive to deviations from long-term mean climate but doesn't show seasonal cycling
2016	Querin et al.	Journal of Applied Remote Sensing	Original research	Two different vegetation covers, preserved and deforested areas in the southwest Amazon rainforest	Albedo	N	Forest conversion into grassland resulted in a decrease of 69% in NDVI and 110% in LAI and a rise of 59% and 24% in albedo and surface temperature, respectively. No changes in any variables were observed in the protected area.	Reduction of vegetation indexes NDVI and LAI with an increase of surface albedo and temperature as the effect of the rainforest converted in grassland
2016	Mallick et al.	Hydrology and Earth System Science	Synthesis	Amazon basin	Transpiration	N	NA	Estimated the canopy-scale biophysical conductances and quantified their control on the terestrial evapotranspiration components
2016	Restrepo-Coupe et al.	Global Change Biology	Synthesis	Model of 4 forests in the Brazil flux network	CO2	N	NA	Found that most DGVMs poorly represented the annual cycle of gross primary productivity (GPP), of photosynthetic capacity (Pc), and of other fluxes and pools
2016	Cusack et al	Review of Geophysics	Review	Humid tropics	N2O, CH4, CO2	N	NA	Reviews effects of drivers (temp, warming, N deposition, kand use change) on C storage, biodiversity, nutrent cycling and some GHG emissions
2016	Navarrete et al.	Jounral of Envionmental Management	Original research	Columbian Amazon	CO2	N	NA	C emissions can be reduced following deforestation throgh low-grazing intensity practices
2017	Wang et al.	Nature Letters	Original research	Amazon lowlands	NA	N	Rainfall in the basin responds closely to changes in glacial boundary conditions in terms of temperature and atmospheric concentrations of carbon dioxide	Reconstructed past 45,000 years of hydroclimate changes in the Amazon lowlands
2017	Meyer et al.	Molecular Ecology	Original research	Rainforest and cattle pasture soils at the Amazon Rainforest Microbial Observatory, Rondonia	CH4	N	NA	Methane-consuming microorganisms have stronger response to land-use change than methane-producing microogranisms
2017	Sobral et al.	Nature Ecology and Evolution	Original research	High-diversity Amazonian system	CO2	N	NA	Positive relationship between mammal and tree species richness and tree biomass and soil C
2017	Zuleta et al.	Ecology	Original research	14,000 trees ≥10 cm dbh in a 25 ha lowland forest plot in the Colombian Amazon	CO2	N	Despite the elevated post‐drought mortality, aboveground biomass increased from 2007 to 2013 by 1.62 Mg ha−1 yr−1	High carbon resiliance to 2010 drought due to enhanced drought-tolerant species
2017	Sullivan et al.	Scientific Reports	Original research	360 plots in intact pan-tropical old-growth closed-canopy forest	CO2	N	Diversity-carbon relationships among plots across tropics are absent, within continents are either weak (Asia) or absent (Amazonia, Africa). A weak positive relationship detectable within 1 ha plots	No clear relationships between diversity and carbon at conservation planning relevent scales
2017	Maeda et al.	Earth System Dynamics	Original research	Amazon basin	transpiration	N	NA	Characteristics of ET seasonality in all sub-basins differ in timing and magnitude, both annual and mean seasonality in ET are driven by a combination of energy and water avaulability.
2017	Taylor et al.	Ecology Letters	Synthesis	Data from 150 tropical forest sites	CO2	Y	In cool forests, high rainfall slowed rates of C cycling, but in warm tropical forests, it consistently enhanced both ANPP and decomposition.	Rainfall and temperature interactions important in C cycle
2018	Giardina et al.	Nature Geoscience	Original research	Amazon forests	NA	N	NA	Variability in precipitation has a greater impact on photosynthesis in tall Amazonian forests than shorter forests
2018	Call et al.	Limnology and Oceanography Letters	Original research	3 major tributaries (black, clear and white water).	CO2, CH4	N	Pore-water further enhanced CO2 supersaturation by 18-47% and is a driver of CH4 dynamics in these waters.	During receding waters, pore-water exchange could be important source of CO2 and CH4 to major black and clear water tributaties
2018	Covey and Megonigal	New Phytologist	Review	NA	CH4	N	Includes table with rates	Review of methane emissions from trees
2018	Mitchard	Nature	Review	Tropical forests	CO2	N	Includes source and sink rates and arrow diagrams	Tropical forests have about neutral contributions to global carbon cycle
2018	Chen et al.	Journal of Geophysical Research	Original research	Regional/ global model	BVOC	Y	Trends in global tree coverage from 2000 to 2015 resulted in a global isoprene emission decrease of only 1.5%,with significant regional variations.	Deforestation and afforestation can increase variations in isoprene emissions
2018	Prairie et al.	Ecosystems	Review	Freshwater resevoirs	CO2, CH4	Y	NA	Determined simple way to quantiy GHG footprint of resevoirs
2018	Negrón‐Juárez	Environmental Research letters	Original research	Regions of Iquitos and Manaus	CO2	N	NA	potential carbon loss from a single large storm event up to 0.14 Pg C
2020	Yanez-Serrano et al.	Global Change Biology	Review	Amazon	BVOCs	N	Interactions between BVOCS and multiple aspects of global change

## Sheet: S3 Drivers
	Supplementary Table 3. References Supporting Main Text Figure 1 and Table 2
Year	Author	Journal	Research Type	Study Site	Landcover type	Forcing Agent	Change Driver	Expected direction of change	Notes
BVOCs
2003	Penuelas and Lluisa	Trends in Plant Science	Review	Global		BVOCs	Warming	Increase
2004	Ganzeveld and Lelieveld	Geophysical Research Letters	Modeling projections	Amazon Basin	Forest	Isoprene	Pasture conversion	Decrease
2008	Betts et al.	Philosophical Transactions B	Review	Amazon	Forest	Isoprene	Forest degradation	Decrease
2009	Laothawornkitkul et al.	New Phytologist	Review	Global		BVOCs	Warming	Increase
2009	Laothawornkitkul et al.	New Phytologist	Review	Global		BVOCs	Increased CO2	Increase, decrease, or no effect
2009	Laothawornkitkul et al.	New Phytologist	Review	Tropics		BVOCs	Forest degradation	Decrease
2009	Laothawornkitkul et al.	New Phytologist	Review	Global		BVOCs	Ozone	Increase, decrease, or no effect
2015	Jardine et al.	Plants	Experimental/observational	Central Amazon	Rainforest	Green leaf volatiles	Warming and drought	Increase
2020	Yanez-Serrano et al.	Global Change Biology	Review	Amazon		BVOCs	Deforestation	Decrease
2020	Yanez-Serrano et al.	Global Change Biology	Review	Amazon		BVOCs	Severe storms	Increase or decrease	Increase via anoxia from root flooding, decerase via mortaility
2020	Yanez-Serrano et al.	Global Change Biology	Review	Amazon		BVOCs	Tree mortality	Dcrease
2020	Yanez-Serrano et al.	Global Change Biology	Review	Amazon		BVOCs	Warming	Increase
2020	Yanez-Serrano et al.	Global Change Biology	Review	Amazon		BVOCs	Drought	Decrease, potentially with transient increase
Methane
1996	Steudler et al.	Journal of Geophysical Research- Atmospheres	Experimental/observational	Rondônia, Brazil	Upland forest	CH4	Pasture conversion	Increased emission
2000	Verchot et al.	Ecosystems	Experimental/observational	Eastern Amazon	Upland forest	CH4	Pasture conversion	Increased or decreased uptake	Decreased uptake in active pastures, increased uptake in degraded pastures
2008	Yashiro et al.	Agricultural and Forest Meterology	Experimental/observational	Peninsular Malaysia	Upland forest	CH4	Logging	Increase in emission, decrease in consumption
2005	Keller et al.	Earth Interactions	Experimental/observational	Tapajos National Forest, Pará, Brazil	Upland forest	CH4	Logging	Increased emission
2008	Davidson et al.	Global Change Biology	Experimental/observational	Santarém, Brazil	Upland forest	CH4	Drying	Increased uptake	Throughfall reduction
2008	Guerin et al.	Geophysical Research Letters	Experimental/observational	French Guiana, Panama	Upland forest	CH4	Reservoirs	Increased emission
2008	Davidson et al.	Global Change Biology	Experimental/observational	Eastern Amazon	Former upland forest	CH4	Fire (slash and burn)	Increase
2009	Bustamante et al.	Amazonia and Global Change (Book)	Synthesis	Amazon rainforest	Upland forest	CH4	Pasture conversion	Increased emission
2011	Sousa-Nito et al	Biogeosciences	Experimental/observational	Brazilian Atlantic forest	Upland forest	CH4	Warming	Increased consumption	From soils- elevation temperature gradient
2012	Davidson et al.	Nature	Review	Amazonia	Upland forest	CH4	Fire	Increase	Pyrogenic emission
2012	Davidson et al.	Nature	Review	Amazonia	Upland forest	CH4	Pasture conversion	Increase	Via addition of ruminants to the landscape
2017	Zhang et al.	PNAS	Modeling projections	Amazon	Wetlands	CH4	Warming	Increase
2019	Jeffrey et al.	New Phytologist	Experimental/observational	Australia	Mangroves	CH4	Climatic extremes	Increased emission	Via climate-mediated mortality
Nitrous Oxide, Nitric oxide
1995	Neff et al.	Journal fo Geophysical Research	Experimental/observational	Costa Rica, Atlantic lowlands	Secondary tropical rainforest	NO	Fire	Increase	Elelvated soil fluxes for 3-4 months post burning
1999	Verchot et al.	Global Biogeochemical Cycles	Experimental/observational	Eastern Amazonia	Upland forest	N2O	Pasture conversion	Decrease
2001	Potter et al.	Forest Ecology and Management	Model	Rondônia and Pará, Brazil	Upland forest	N2O	Deforestation	Increase	1 year post
2001	Dias-Filjo et al.	The Biogeochemistry of the Amazon Basin (Book)	Experimental/observational	Fazenda Vittoria, Brazil	Upland forest	N2O	Pasture conversion	Decrease
2002	Steudler et al.	Global Change Biology	Experimental/observational	Central Rondônia, Brazil	Upland forest	N2O	Pasture conversion	Decrease
2002	Steudler et al.	Global Change Biology	Experimental/observational	Central Rondônia, Brazil	Upland forest	N2O	Pasture conversion plus fertilization	Increase
2004	Erikson and Ayala	Global Change Biology	Experimental/observational	Puerto Rico	Upland forest	N2O	Severe storms	Increase
2005	Neill et al.	Nutrient Cycling in Agroecosystems	Synthesis	Rondônia, Brazil	Upland forest	N2O	Pasture conversion	Increase or decrease	Increase in young pasture (1-3 years), decrease in older
2005	Keller et al.	Earth Interactions	Experimental/observational	Tapajos National Forest, Pará, Brazil	Upland forest	N2O, NO	Logging	Increase
2008	Yashiro et al.	Agricultural and Forest Meterology	Experimental/observational	Peninsular Malaysia	Upland forest	N2O	Logging	Increased emission	Fot 1 year post logging
2008	Davidson et al.	Global Change Biology	Experimental/observational	Santarém, Brazil	Upland forest	N2O	Drying	Decrease	Throughfall reduction
2008	Davidson et al.	Global Change Biology	Experimental/observational	Eastern Amazon	Former upland forest	N2O	Fire (slash and burn)	Increase	Pyrogenic emission
2008	Guerin et al.	Geophysical Research Letters	Experimental/observational	French Guiana, Panama	Upland forest	N2O	Reservoirs	Increase
2009	D'Amelio et al.	Atmospheric Chemistry and Physics	Experimental/observational	Eastern and Central Amazon	Upland forest	N2O	Biomass burning	Increase
2010	Galford et al.	PNAS	Modeling	Mato Grasso, Brazil	Upland forest	N2O	Warming	Increase
2011	Wieder et al.	Global Change Biology	Experimental/observational	Costa Rica	Upland forest	N2O	Drought	Increase
2011	Sousa-Nito et al	Biogeosciences	Experimental/observational	Brazilian Atlantic forest	Upland forest	N2O	Warming	Increase	Elevation temperature gradient
2012	Davidson et al.	Nature	Review	Amazonia	Upland forest	N2O	Fire	Increase	Pyrogenic emission
Black C
1998	Echelar et al.	Journal of Geophysical Research- Atmospheres	Experimental/observational	Amazon Basin	Forest	Black C	Fire	Increased emissions
2007	Aragão et al.	Journal of Geophysical Research- Atmospheres	Experimental/observational	Amazonia	Forest	Black C	Drought	Increased emissions	Black C emissions inferred from increased drought-assosiated fire frequency by Covey et al.
2009	Cochrane and Barber	Global Change Biology	Review	Amazon	Forest	Black C	Warming, drought, fragmentation	Increased emissions	Inferred from increased fire frequency by Covey eta al.
2011	Alencar et al.	Ecological Applications	Experimental/observational	Eastern Amazon	Forest	Black C	Drought	Increased emissions	Inferred from increased fire frequency by Covey et al.
2015	Mishra et a.	Atmopsheric Environement	Experimental/observational	Amazon Basin	Forest	Black C	Fire	Increased emissions	Smoke' assumed to corrleate with Black C by Covey et al.
2015	Alencar et al.	Ecological Applications	Experimental/observational	Eastern Amazon	Open and transitional forests	Black C	Deforestation-induced fragmentation	Increased emissions	Inferred from increased fire frequency by Covey eta al.
2017	De Faria et al.	Environmental Research Letters	Modeling	Amazon	Forest	Black C	Warming	Increased emissions	Inferred from increased simulated future fire frequency by Covey et al.
2017	De Faria et al.	Environmental Research Letters	Modeling	Amazon	Forest	Black C	Drought	Increased emissions	Inferred from increased simulated future fire frequency by Covey et al.
2008	Cochrane and Lawrence	Ambio	Review	Amazon	Forest	Black C	Logging, forest fragmentation	Increased emissions	Inferred from increased fire frequency by Covey eta al.
2018	Aragão et al.	Nature Communications	Modeling, experimental/observational	Brazilian Amazon	Forest	Black C	Drought	Increased emissions	Inferred from increased drought-assosiated fire frequency by Covey et al.
CO2
2000	Fearnside	Global Climate Change and Tropical Ecosystems (Book)	Synthesis	Legal Amazon	Forest	CO2	Pasture conversion	Increased emissions	Biomass decay and soil C losses in the first 15 years
2003	Cerri et al.	Soil Science Society of America Journal	Experimental/observational, modeling	Rondônia, Brazil, Brazil	Upland forest	CO2	Pasture	Decreased stoarge, then increased storage	Soil C stocks only. Increased stoarge by 88 years
2007	Nepstad et al.	Ecology	Experimental/observational, modeling	Amazon	Upland forest	CO2	Drought	Increased emissions	Inferred from increased tree mortaility by Covey et al.
2001	Dias-Filjo et al.	The biogeochemistry of the Amazon Basin (Book)	Synthesis	Amazon	Upland forest	CO2	Pasture conversion	Increased, decreased or mixed changes in soil C storage	Depending on pasture degredation status and fertility (not inlcluding above ground cbiomass C loss during pasture establishment)
2007	Oliviera et al.	Tellus B	Experimental/observational	Rondônia, Brazil, Para, Brazil	Upland forest	CO2	Fire	Reduced or increased uptake	NPP supressed by insolation decreases from biomass burning aerosols at high concentrations, stimulated by increased diffuse radiation at low concentrations
2008	Doughty and Goulden	Journal of Geophysical Research- Biogeosciences	Experimental/observational	Para, Brazil	Upland forest	CO2	Warming	Reduced uptake	Short term (hour) temperature increases
2008	Brando et al.	Philosophical Transactions B	Experimental/observational	Pará, Brazil	Upland forest	CO2	Drought	Reduced uptake	Experimental throughfall reduction, reduced ANPP
2009	Van Der Worth et al.	Biogeosciences	Modeling	Mato Grasso, Brazil	Tropical forest	CO2	Fire assosiated with deforestation	Increase
2009	Phillips et al.	Science	Experimental/observational	Amazon Basin and contiguous lowland moist forests	Upland forest	CO2	Drought	Increased emissions	2005 drought, biomass loss
2010	Galford et al.	PNAS	Modeling	Mato Grasso, Brazil	Upland forest	CO2	Pasture and agricultural conversion	Increased emission
2010	Maia et al.	Global Change Biology	Experimental/observational, modeling	Rondônia, Brazil, Brazil	Upland forest	CO2	Agricultural Management	Decreased stoarge	Soil C stocks
2010	Metcalfe et al.	New Phytologist	Experimental/observational	Eastern Amazon	Upland forest	CO2	Drought	Reduced uptake	Decreased NPP
2010	Negron-Juarez et al.	Geophysical Research Letters	Experimental/observational	Amazonia	Upland forest	CO2	Severe storms	Reduced uptake	Via tree mortality
2010	Asner et al.	PNAS	Experimental/observational	Peruvian Amazon	Upland forest	CO2	Selective logging	Increased emissions
2011	Sousa-Nito et al	Biogeosciences	Experimental/observational	Brazilian Atlantic forest	Upland forest	CO2	Warming	Increased emission	From soils- elevation temperature gradient
2013	Asner et al.	PNAS	Experimental/observational	Madre de Dios region, Peru	Upland forest	CO2	Gold mining	Reduced uptake	Via deforestation
2014	Beregnuer et al.	Global Change Biology	Experimental/observational	Eastern Amazon- Santarém‐Belterra and Paragominas	Upland forest	CO2	Selective logging	Reduced storage
2014	Beregnuer et al.	Global Change Biology	Experimental/observational	Eastern Amazon- Santarém‐Belterra and Paragominas	Upland forest	CO2	Fires	Reduced storage
2014	Gatti et al.	Nature	Experimental/observational	Amazon	All	CO2	Drought	Reduced uptake
2014	Aragão et al.	Biological Reviews	Synthesis	Brazilian Amazon	All	CO2	Drought, Fire, Deforestation	Increased emissions
2015	Rap et al.	Geophysical Research Letters	Modeling, experimental/observational	Amazon Basin	All	CO2	Fire	Increased uptake	NPP stimulated by diffuse radiation increase from biomass burning aerosols
2016	Peros et al.	PNAS	Experimental/observational	Amazon Basin	Upland forest	CO2	Hunting	Reduced uptake	Via shifting species composition
2017	Sonter et al.	Nature Communications	Experimental/observational	Brazilian Amazon	Forest	CO2	Mining	Increased emission	Mediated via deforestation
2018	Aragão et al.	Nature Communications	Modeling, experimental/observational	Brazilian Amazon	Forest	CO2	Drought-induced fire	Increased emissions
2018	Marengo et al.	Frontiers in Earth Science	Synthesis	Amazon	All	CO2	Warming	Increase or decrease	Depending on tree mortaility, photosynethic responses, degree of biomass response
2018	McDowell et al.	Global Change Biology	Synthesis	Global	Moist tropical forests	CO2	Warming	Increase	Inferred from increased tree mortaility by Covey et al.
2018	Espejo et al.	Remote Sensing	Experimental/observational	Peruvian Amazon	Upland forest	CO2	Gold mining	Increased emissions	Mediated via deforestation
2018	Negron-Juarez et al.	Environmental Research Letters	Modeling	Amazon Basin	Upland forest	CO2	Severe storms	Reduced uptake	Via tree mortality
2019	Cameron et al	Science of the Total Environment	Experimental/observational	Indonesia	Mangroves	CO2	Clearing	Increased emission
2019	Cameron et al	Science of the Total Environment	Experimental/observational	Indonesia	Mangroves	CO2	Clearing	Increased emission
Evapotransipration
1990	Shukla et al.	Science	Modeling	Brazilian Amazon	Forest	Evapotranspiration	Pasture conversion	Decrease
2007	Sampaio et al.	Geophysical Research Letters	Modeling	Amazonia	Forest	Evapotranspiration	Deforestation, agricultural conversion	Decrease	Main effects during dry season
2008	Doughty and Goulden	Journal of Geophysical Research- Biogeosciences	Experimental/observational	Pará, Brazil	Upland forest	Evapotranspiration	Warming	Increase	Leaf ET between 30 and 38 C
2015	De Oliviera et al.	AGU Abstracts	Experimental/observational	Pará, Brazil	Forest	Evapotranspiration	Fire	Decrease
2015	Pinto Dias et al.	Journal of Hydrology: Regional Studies	Modeling	Southeastern Amazonia	Forest	Evapotranspiration	Agriculural and pasture conversion	Decrease
2016	Nagy et al.	Interactions Between Biosphere, Atmosphere and Human Land Use in the Amazon (Book)	Synthesis	Amazon	Forest	Evapotranspiration	Agriculural and pasture conversion	Decrease
2017	Khand et al.	Remote Sensing	Experimental/observational	Acra, Rondônia, Mato Grasso, Brazil	Forest	Evapotranspiration	Fire	Decrease	Degraded' (burned) forests
2018	Marengo et al.	Frontiers in Earth Science	Synthesis	Amazon	Forest	Evapotranspiration	Increased CO2	Decrease
2019	De Oliviera et al.	Ecohydrology	Experimental/observational	Rondônia, Brazil	Forest	Evapotranspiration	Agriculural conversion	Decrease
2019	Baker and Spraklen	Frontiers in Forests and Global Change	Experimental/observational	Amazon	Forest	Evapotranspiration	Deforestation	Decrease
Albedo
1993	Kaufman and Nakajima	Journal of Applied Meterology	Experimental/observational	Amazon		Albedo	Fire	Decrease	Mediated by decreased cloud reflectance
1994	Culf	Journal of Climate	Experimental/observational	Brazilian Amazon	Forest	Albedo	Pasture conversion	Increase
1997	Giambelluca	Journal of Climate	Experimental/observational	Pará, Brazil	Forest	Albedo	Agricultural conversion	Increase
2002	Schafer et al.	Journal of Geophysical Research	Experimental/observational	Rondônia and Mato Grasso, Brazil	Forest	Albedo	Fire	Increase	Reduces surface insolation
2004	Koren et al.	Science	Experimental/observational	Amazon		Albedo	Fire	Decrease	Mediated by decreased cloud formation
2004	Randow et al.	Theoretical and Applied Climatology	Experimental/observational	Southwest Amazonia	Forest	Albedo	Pasture conversion	Increase
2011	Loarie et al.	Earth Interactions	Experimental/observational	Southeastern edge of the Brazilian Amazon	Forest	Albedo	Deforestation, conversion to ag or pasture	Increase	Pasture and crops more reflective than forest
2011	Loarie et al.	Earth Interactions	Experimental/observational	Southeastern edge of the Brazilian Amazon	Forest	Albedo	Reservoirs	Mixed	Indirect effects on local surface waters and wetland extent
2012	Ten Hoeve et al.	Journal of Geophysical Research- Atmospheres	Modeling	Amazon		Albedo	Fire	Increase or decrease	Depending on aereosol load. Mediated by inhibition or stimulation of cloud formation or increase in cloud absorption
2018	De Oliveiera Faria et al.	Ambiente e Agua	Experimental/observational	Mato Grosso, Brazil	Forest	Albedo	Fire	Decrease	Surface albedo of burn scars
